# Supplementary material for: Novel Biotinylated Cu(II)-Phenanthroline Complexes: 2D and 3D Cytotoxic Activity and Mechanistic Insight
Source: MDPI journal article supplement (doi:10.3390/molecules28104112), 2023-05-16
Supplement: s1 [file s1]

## Supplementary Information

### Novel Biotinylated Cu(II)-Phenanthroline Complexes: 2D and 3D Cytotoxic Activity and Mechanistic Insight

Stephen Barrett, Michele De Franco, Chiara Donati, Cristina Marzano, Valentina Gandin  
and Diego Montagner

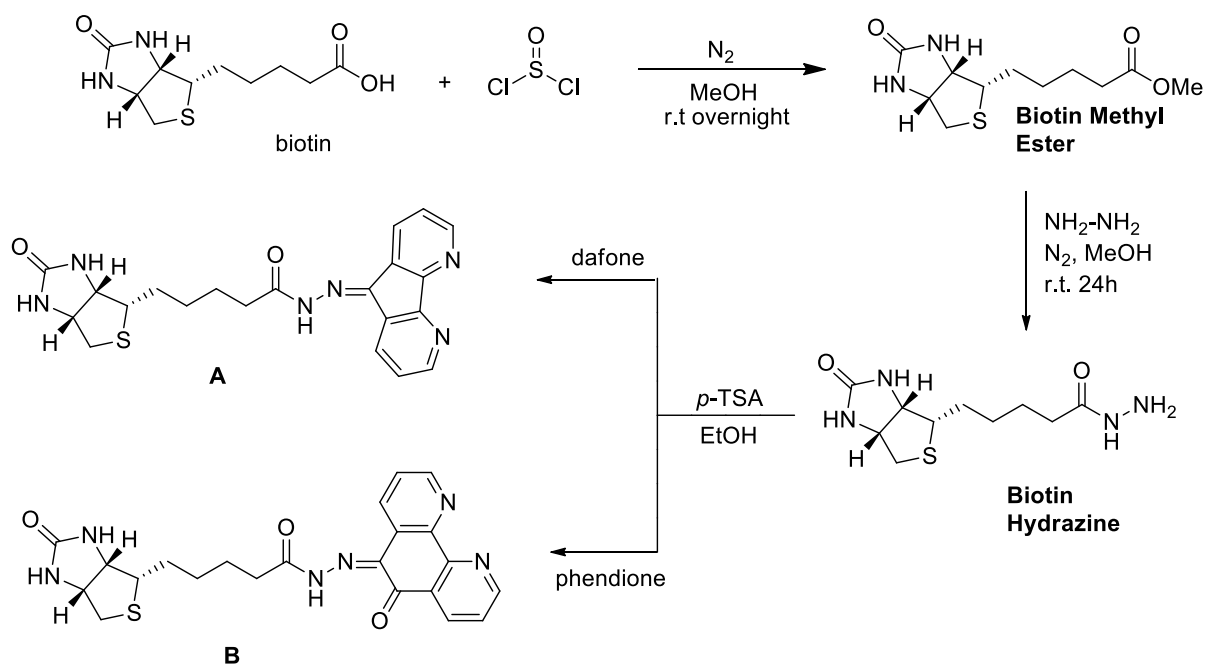

**Scheme S1.** Synthetic pathway for the production of the two biotinylated ligands **A** and **B**.

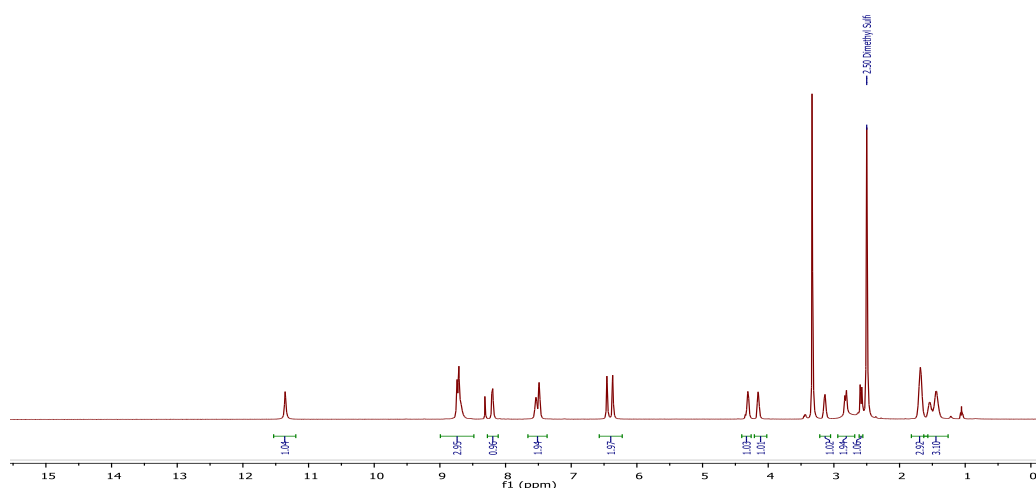

**Figure S1.**  $^1\text{H-NMR}$  of **A** in  $\text{DMSO-}d_6$ .



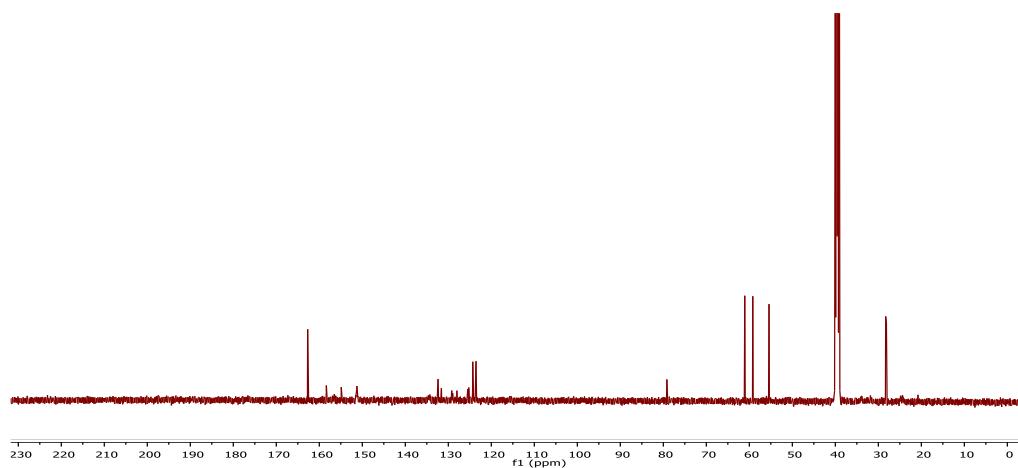

**Figure S2.**  $^{13}\text{C}$ -NMR of **A** in  $\text{DMSO-}d_6$ .

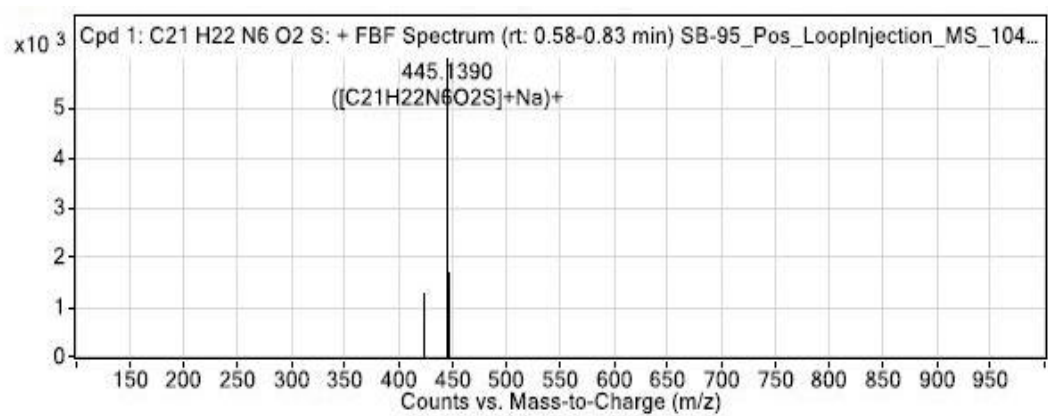

**Figure S3.** HR-MS spectrum of **A**.

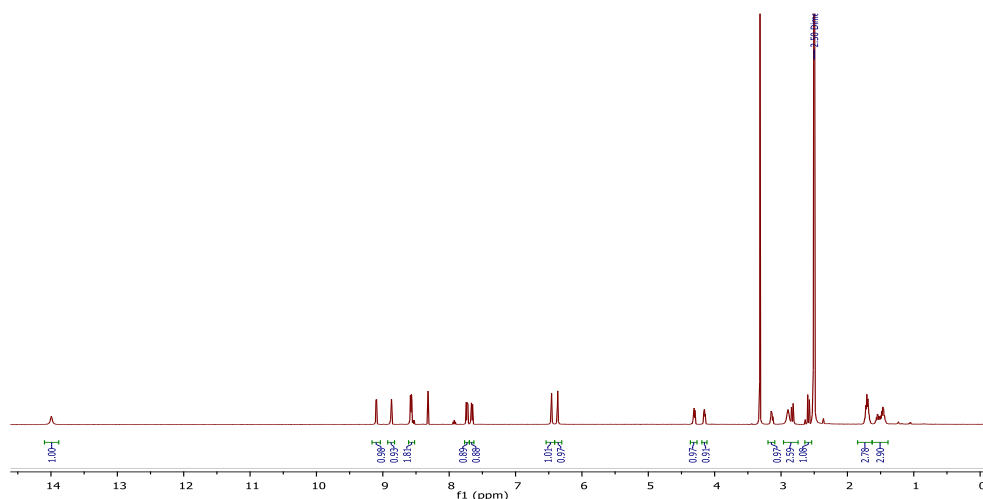

**Figure S4.**  $^1\text{H}$ -NMR of **B** in  $\text{DMSO-}d_6$ .



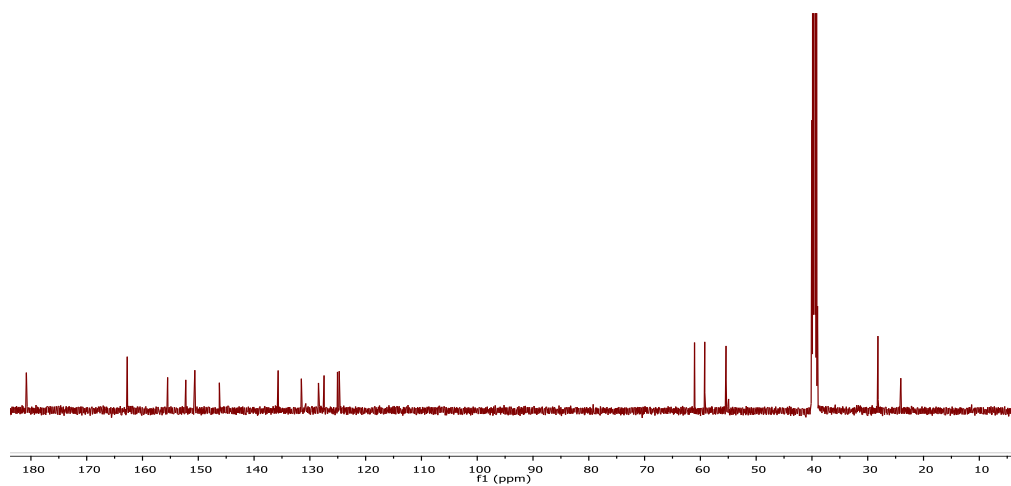

Figure S5.  $^{13}\text{C}$ -NMR of B in  $\text{DMSO-}d_6$ .

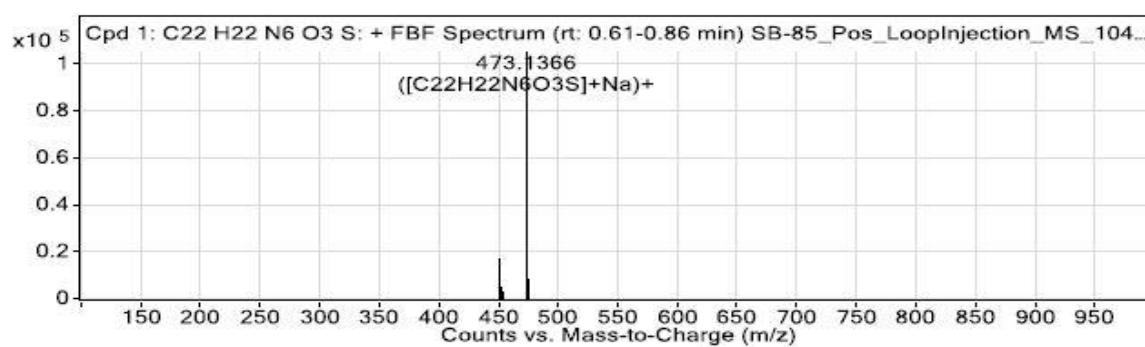

Figure S6. HR-MS spectrum of B.

Figure: Extracted ion chromatogram (EIC) of compound.

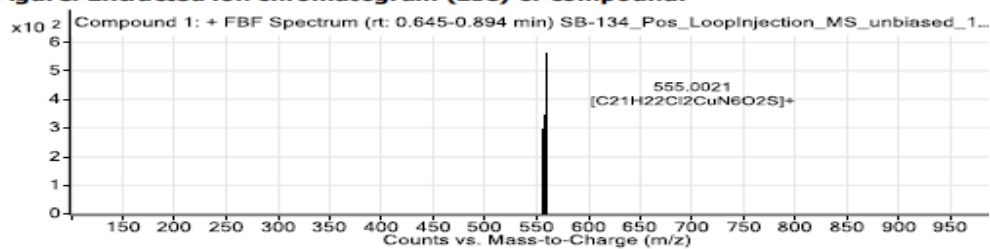

Figure: Full range view of Compound spectra and potential adducts.

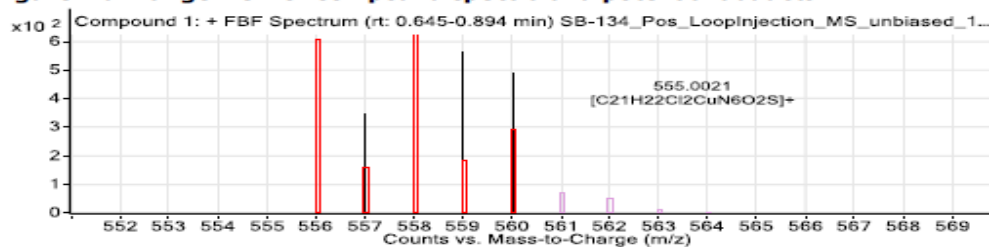

Figure S7. HR-MS spectrum of complex 1.



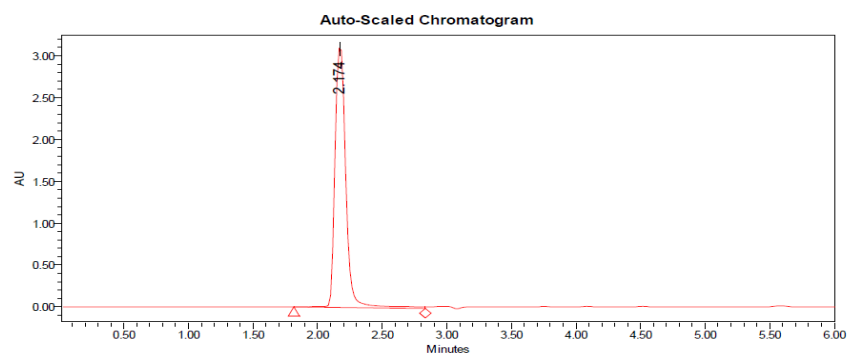

**Figure S8.** HPLC chromatogram of complex **1** in DMF/Acetonitrile solution (HEPES buffer pH = 6.8).

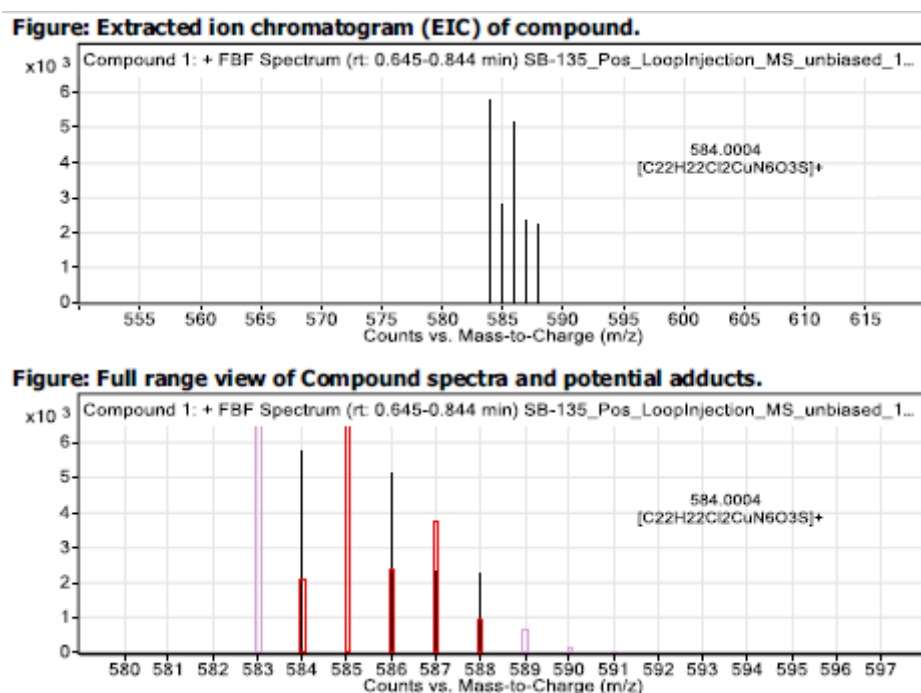

**Figure S9.** HR-MS spectrum of complex **2**.

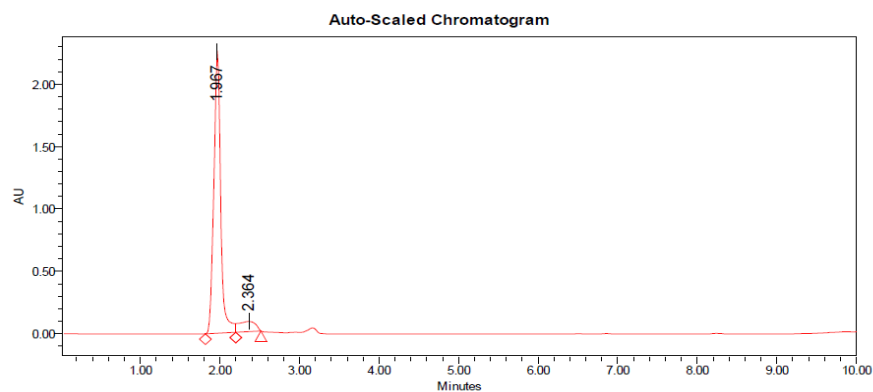

**Figure S10.** HPLC chromatogram of complex **2** in DMF/Acetonitrile solution (HEPES buffer pH = 6.8).



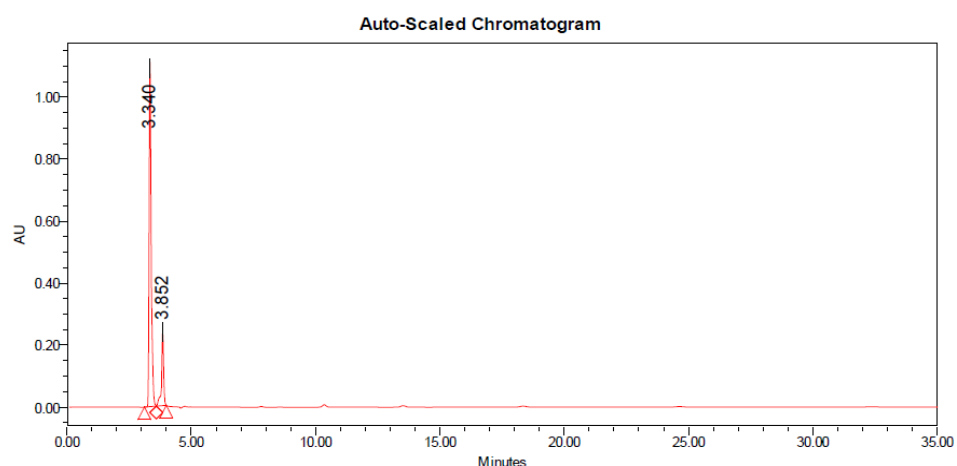

**Figure S11.** HPLC chromatogram of complex **3** in DMF/Acetonitrile solution (HEPES buffer pH = 6.8).

**Figure: Extracted ion chromatogram (EIC) of compound.**

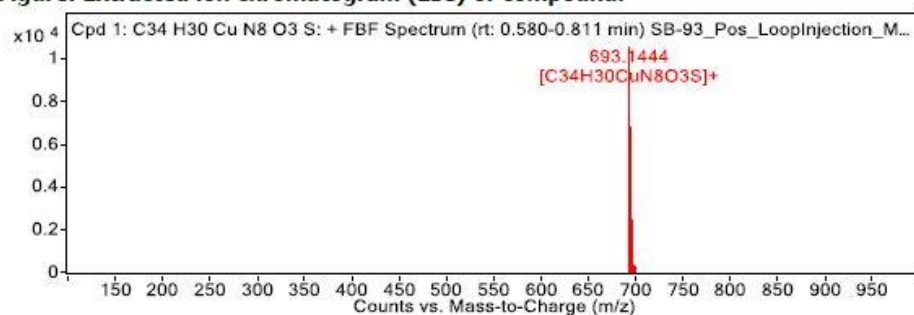

**Figure: Full range view of Compound spectra and potential adducts.**

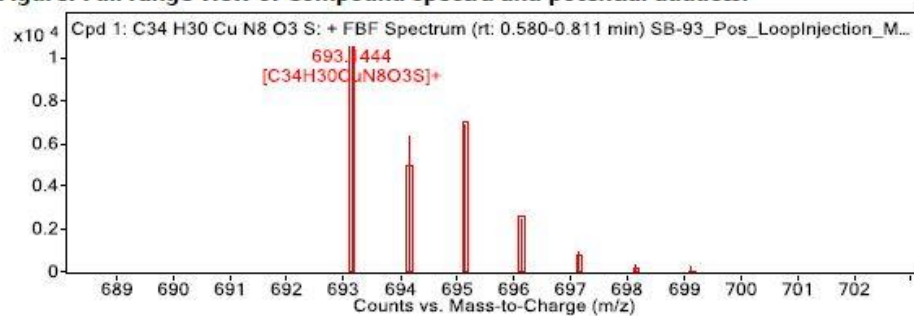

**Figure S12.** HR-MS spectrum of complex **4**



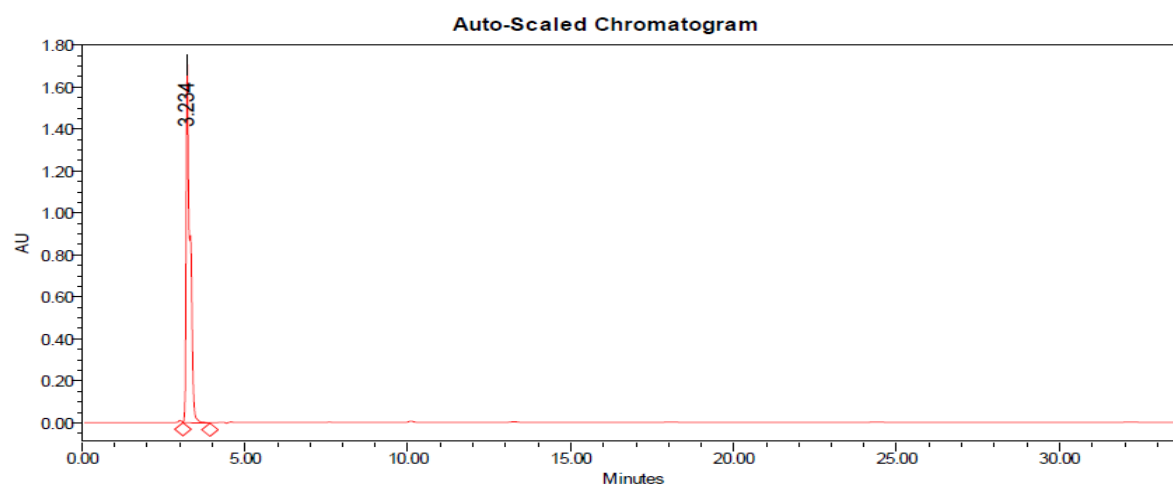

**Figure S13.** HPLC chromatogram of complex **4** in DMF/Acetonitrile solution (HEPES buffer pH = 6.8).



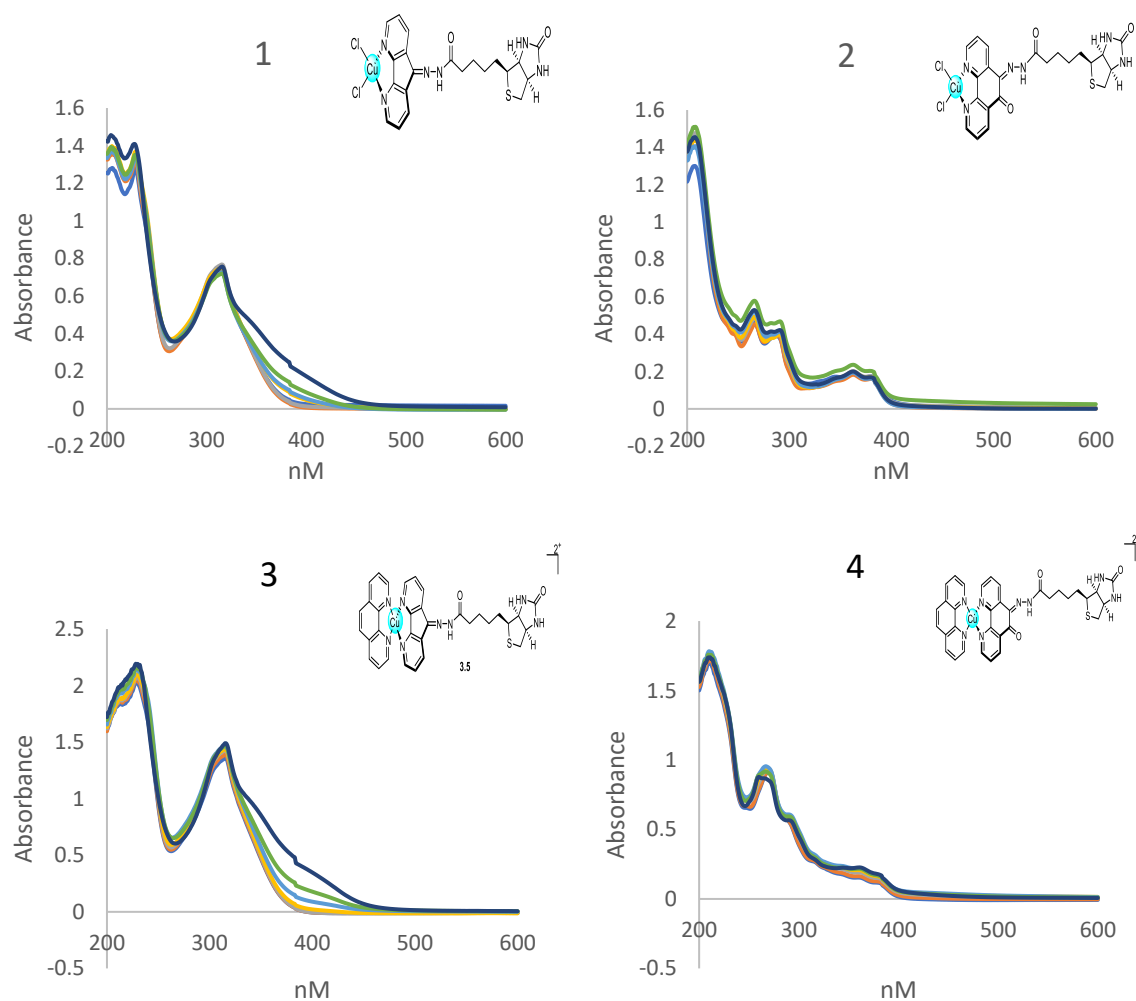

**Figure S14.** pH Dependence and Stability. UV VIS spectra of complexes **1-4** in the pH range 4-9. ● pH = 4; ● pH = 5; ● pH = 6; ● pH = 6 after 1 week; ● pH = 7; ● pH = 8; ● pH = 9.



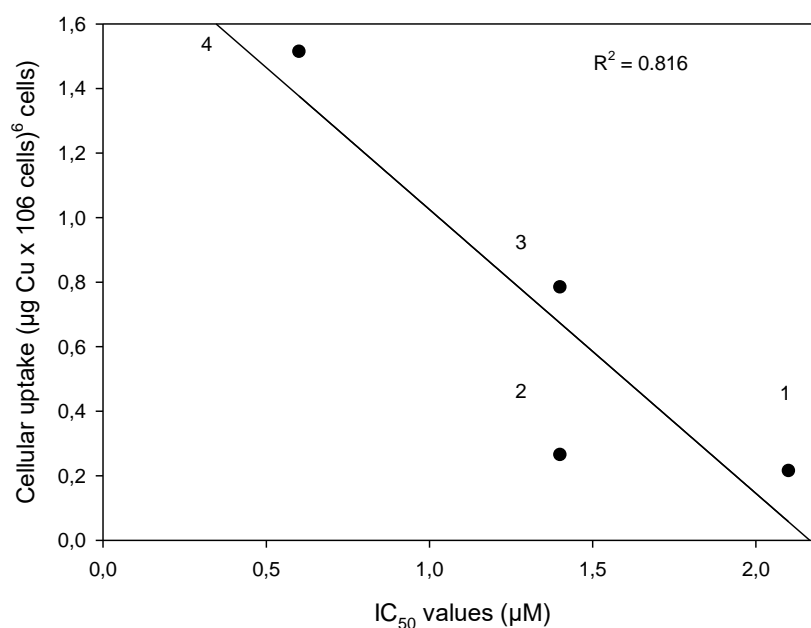

**Figure S15.** Correlation between cytotoxicity ( $IC_{50}$ ) and cellular copper content in drug-treated MDA-MB-231 human cancer cells of complexes **1-4**.

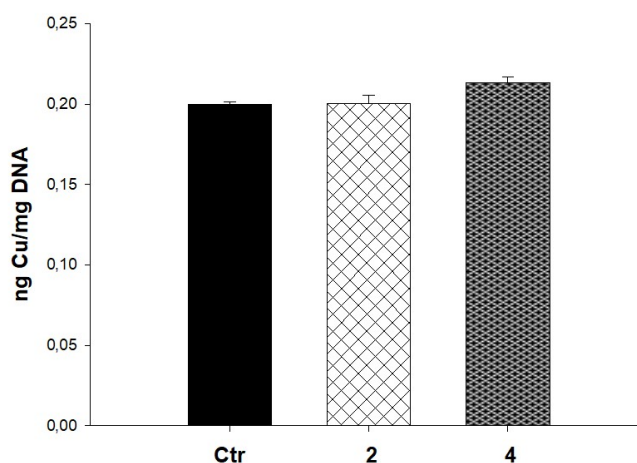

**Figure S16.** DNA metalation studies in MDA-MB-231 human cancer cells of complexes **2** and **4**. Cells ( $5 \times 10^6$ ) were seeded in 10 cm (diameter) Petri dishes in 10 mL of culture medium. Subsequently, cells were treated with 4  $\mu$ M of tested complexes for 24 h. DNA was extracted and purified using a commercial spin column quantification kit (Qiagen DNeasy Blood and Tissue Kit). Only highly purified samples ( $A_{260}/A_{230} \sim 1.8$  and  $A_{280}/A_{260} \sim 2.0$ ) were included. Samples were then completely dried and re-dissolved in 200  $\mu$ L of Milli-Q water (18.2 MW) for at least 20 min at 65  $^{\circ}$ C in a shaking thermo-mixer. Finally, samples were mineralized and the amount of cellular Cu was estimated by GF-AAS. Error bars are S.D.
